# Supplementary material for: DNA exonuclease Trex1 regulates radiotherapy-induced tumour immunogenicity
Source: Springer Nature journal article supplement (doi:10.1038/ncomms15618), 2017-06-09
Supplement: 41467_2017_BFncomms15618_MOESM306_ESM.pdf [file 41467_2017_BFncomms15618_MOESM306_ESM.pdf]

**Editorial Note:** this manuscript has been previously reviewed at another journal that is not operating a transparent peer review scheme. This document only contains reviewer comments and rebuttal letters for versions considered at Nature Communications.
